# Supplementary material for: Phytochemical Profiling, Biological Activities, and In Silico Molecular Docking Studies of Causonis trifolia (L.) Mabb. & J.Wen Shoot
Source: MDPI journal article supplement (doi:10.3390/plants12071495), 2023-03-29
Supplement: s1 [file s1]

Table S1. Adequacy of the model tested.

| Model            | Sequential p-value | Lack of Fit p-value | Adjusted R    | Predicted R   |                  |
|------------------|--------------------|---------------------|---------------|---------------|------------------|
| Linear           | 0.9846             | < 0.0001            | -0.2168       | -0.4107       |                  |
| 2FI              | 0.9906             | < 0.0001            | -0.5653       | -1.2881       |                  |
| <b>Quadratic</b> | <b>&lt; 0.0001</b> | <b>0.2642</b>       | <b>0.9849</b> | <b>0.9330</b> | <b>Suggested</b> |
| Cubic            | 0.2642             |                     | 0.9892        |               |                  |

Table S2. The result of ANOVA analysis

| Scheme            | Sum of Squares | Degree of freedom | Mean Square | F-value | p-value  |             |
|-------------------|----------------|-------------------|-------------|---------|----------|-------------|
| <b>Model</b>      | 8000.53        | 9                 | 888.95      | 116.87  | < 0.0001 | significant |
| A-Solvent         | 87.58          | 1                 | 87.58       | 11.51   | 0.0115   |             |
| B-Temperature     | 2.87           | 1                 | 2.87        | 0.3770  | 0.5586   |             |
| C-Extraction time | 1.14           | 1                 | 1.14        | 0.1499  | 0.7102   |             |
| AB                | 36.78          | 1                 | 36.78       | 4.84    | 0.0638   |             |
| AC                | 1.96           | 1                 | 1.96        | 0.2577  | 0.6273   |             |
| BC                | 44.36          | 1                 | 44.36       | 5.83    | 0.0464   |             |
| A <sup>2</sup>    | 1904.85        | 1                 | 1904.85     | 250.42  | < 0.0001 |             |
| B <sup>2</sup>    | 2123.01        | 1                 | 2123.01     | 279.10  | < 0.0001 |             |
| C <sup>2</sup>    | 2984.19        | 1                 | 2984.19     | 392.32  | < 0.0001 |             |
| <b>Residual</b>   | 53.25          | 7                 | 7.61        |         |          |             |

|                                |         |    |       |      |        |                 |
|--------------------------------|---------|----|-------|------|--------|-----------------|
| Lack of Fit                    | 31.59   | 3  | 10.53 | 1.95 | 0.2642 | not significant |
| Pure Error                     | 21.65   | 4  | 5.41  |      |        |                 |
| <b>Cor Total</b>               | 8053.78 | 16 |       |      |        |                 |
| <b>Standard deviation</b>      | 2.76    |    |       |      |        |                 |
| <b>Mean</b>                    | 119.54  |    |       |      |        |                 |
| <b>CV%</b>                     | 2.31    |    |       |      |        |                 |
| <b>R<sup>2</sup></b>           | 0.9934  |    |       |      |        |                 |
| <b>Adjusted R<sup>2</sup></b>  | 0.9849  |    |       |      |        |                 |
| <b>Predicted R<sup>2</sup></b> | 0.9330  |    |       |      |        |                 |
| <b>Adequate precision</b>      | 25.2369 |    |       |      |        |                 |

Table S3. Binding energy scores calculated by iGEMDOCK 2.1 for 19 phytocompounds against antiinflammatoryantiinflammatory (e.g., Tnf- $\alpha$  and Cox-2), antioxidant (e.g. SOD) and antidiabetic ( $\alpha$  -Amylase and Aldo reductase) target proteins. (Tnf- $\alpha$ : Tumor necrosis factor alpha, Cox-2: Cy-clooxygenase 2, SOD: Superoxide dismutases)

| Sl. No. | Name of the compound                                                                                                                                       | Target proteins             |                     |                                 |                                 |                              |
|---------|------------------------------------------------------------------------------------------------------------------------------------------------------------|-----------------------------|---------------------|---------------------------------|---------------------------------|------------------------------|
|         |                                                                                                                                                            | Antiinflammatory            |                     | Antioxidant                     | Antidiabetic                    |                              |
|         |                                                                                                                                                            | Tnf- $\alpha$<br>(Kcal/mol) | Cox-2<br>(Kcal/mol) | Superoxide dismutase (Kcal/mol) | $\alpha$ -Amylase<br>(Kcal/mol) | Aldo reductase<br>(Kcal/mol) |
| 18      | 1,2,4-Metheno-1H-indene, octahydro-1,7a-dimethyl-5-(1-methylethyl)-, [1S-(1 $\alpha$ ,2 $\alpha$ ,3a $\beta$ .,4 $\alpha$ .,5 $\alpha$ ,7a $\beta$ .,8S*)] | -70.8462                    | -70.5264            | -60.4064                        | -62.0786                        | -70.8876                     |
| 13      | 1,4-Methano-1H-indene, octahydro-4-methyl-8-methylene-7-(1-methylethyl)-, [1S-(1 $\alpha$ ,3a $\beta$ .,4 $\alpha$ ,7 $\alpha$ ,7a $\beta$ )]              | -68.373                     | -77.4816            | -56.8787                        | -59.77                          | -71.0972                     |
| 3       | 1,5-Cyclodecadiene, 1,5-dimethyl-8-(1-methylethenyl)-, [S-                                                                                                 | -69.0209                    | -80.3145            | -52.3437                        | -63.2604                        | -70.9953                     |

|    |                                                                                                                                 |          |          |          |          |          |
|----|---------------------------------------------------------------------------------------------------------------------------------|----------|----------|----------|----------|----------|
|    | (Z,E)]-                                                                                                                         |          |          |          |          |          |
| 5  | 11,11-Dimethyl-<br>spiro [2,9] dodeca-<br>3,7-dien                                                                              | -60.8135 | -74.7328 | -54.7702 | -61.4609 | -64.6676 |
| 14 | 1H-3a,7-<br>Methanoazulene,<br>octahydro-1,9,9-<br>trimethyl-4-<br>methylene-,<br>(1.α.,3αα.,7 α.,8αβ)                          | -62.6197 | -72.0267 | -57.8419 | -58.2319 | -63.3848 |
| 4  | 1H-<br>Cyclopropa[a]napht<br>halene.<br>1a,2,3,5,6,7,7a,7b-<br>octahydro-1,1,7,7a-<br>tetramethyl-, [1aR-<br>(1αα,7α,7αα,7bα)]- | -64.9959 | -70.2567 | -52.0365 | -60.9246 | -66.3327 |
| 11 | 1-Isopropyl-4,7-<br>dimethyl-<br>1,2,3,5,6,8a-<br>hexahydronaphthale                                                            | -64.3723 | -74.823  | -56.8958 | -66.4112 | -75.4169 |

| ne |                                                                                                        |          |          |          |          |          |
|----|--------------------------------------------------------------------------------------------------------|----------|----------|----------|----------|----------|
|    | 2H-Pyran,<br>tetrahydro-4-<br>methyl-2-(2-methyl-<br>1-propenyl)                                       | -59.2257 | -69.2979 | -54.6078 | -57.9675 | -65.3748 |
| 12 | 3H-3a,7-<br>Methanozulene,<br>2,4,5,6,7,8-<br>hexahydro-1,4,9,9-<br>tetramethyl-, [3aR-<br>(3α,4β,7α)] | -61.6378 | -64.4594 | -53.5194 | -60.5456 | -64.6886 |
| 16 | 3-Methylmannoside                                                                                      | -72.3599 | -83.1708 | -68.0867 | -69.7768 | -83.3957 |
| 15 | 3-O-Methyl-d-<br>glucose                                                                               | -78.693  | -90.4112 | -74.4558 | -78.8684 | -97.5636 |
| 6  | 5,7-Dodecadiyne-<br>1,12-diol                                                                          | -69.7264 | -91.2112 | -75.9038 | -75.5249 | -87.9113 |
| 1  | Caryophyllene                                                                                          | -61.8269 | -67.428  | -46.6963 | -60.2325 | -65.3311 |
| 8  | Ergosta-5,22-dien-3-<br>ol, acetate,<br>(3β,22E)-                                                      | -93.0843 | -92.0437 | -87.7343 | -108.844 | -115.66  |

|    |                                                                                     |          |          |          |          |          |
|----|-------------------------------------------------------------------------------------|----------|----------|----------|----------|----------|
| 9  | Germacrene D                                                                        | -70.6613 | -81.3181 | -53.202  | -66.6915 | -70.7977 |
| 10 | Humulene                                                                            | -63.2139 | -71.0528 | -49.4899 | -59.9427 | -66.7441 |
| 17 | Naphthalene,<br>1,2,4a,5,6,8a-<br>hexahydro-4,7-<br>dimethyl-1-(1-<br>methylethyl)- | -69.9012 | -78.3814 | -54.6416 | -64.1552 | -72.1134 |
| 2  | $\alpha$ -Copaene                                                                   | -65.7724 | -78.902  | -57.0262 | -63.7201 | -73.4357 |
| 7  | $\gamma$ -Elemene                                                                   | -64.4953 | -74.5854 | -53.0233 | -61.3088 | -74.8143 |
